# Warped Bayesian Linear Regression for Normative Modelling of Big Data

Charlotte J. Fraza<sup>a,b</sup>, Richard Dinga<sup>a</sup>, Christian F. Beckmann<sup>a,b,d</sup>, Andre F. Marquand<sup>a,b,c</sup>

<sup>a</sup>*Donders Centre for Cognitive Neuroimaging, Donders Institute for Brain, Cognition and Behaviour, Radboud University, Nijmegen, the Netherlands*

<sup>b</sup>*Department of Cognitive Neuroscience, Radboud University Medical Centre, Nijmegen, the Netherlands*

<sup>c</sup>*Department of Neuroimaging, Centre for Neuroimaging Sciences, Institute of Psychiatry, King's College London, London, UK*

<sup>d</sup>*Oxford Centre for Functional Magnetic Resonance Imaging of the Brain (FMRIB), University of Oxford, Oxford, UK*

---

## Abstract

Normative modelling is becoming more popular in neuroimaging due to its ability to make predictions of deviation from a normal trajectory at the level of individual participants. It allows the user to model the distribution of several neuroimaging modalities, giving an estimation for the mean and centiles of variation. With the increase in the availability of big data in neuroimaging, there is a need to scale normative modelling to big data sets. However, the scaling of normative models has come with several challenges.

So far, most normative modelling approaches used Gaussian process regression, and although suitable for smaller datasets (up to a few thousand participants) it does not scale well to the large cohorts currently available and being acquired. Furthermore, most neuroimaging modelling methods that are available assume the predictive distribution to be Gaussian in shape. However, deviations from Gaussianity can be frequently found, which may lead to incorrect inferences, particularly in the outer centiles of the distribution. In normative modelling, we use the centiles to give an estimation of the deviation of a particular participant from the ‘normal’ trend. Therefore, especially in normative modelling, the correct estimation of the outer centiles is of utmost importance, which is also where data are sparsest.

Here, we present a novel framework based on Bayesian Linear Regression with likelihood warping that allows us to address these problems, that is,

to scale normative modelling elegantly to big data cohorts and to correctly model non-Gaussian predictive distributions. In addition, this method provides also likelihood-based statistics, which are useful for model selection.

To evaluate this framework, we use a range of neuroimaging-derived measures from the UK Biobank study, including image-derived phenotypes (IDPs) and whole-brain voxel-wise measures derived from diffusion tensor imaging. We show good computational scaling and improved accuracy of the warped BLR for certain IDPs and voxels if there was a deviation from normality of these parameters in their residuals.

The present results indicate the advantage of a warped BLR in terms of; computational scalability and the flexibility to incorporate non-linearity and non-Gaussianity of the data, giving a wider range of neuroimaging datasets that can be correctly modelled.

*Keywords:* Machine learning, UK Biobank, Big Data, Bayesian Linear Regression, Normative Modelling

---

## 1 Introduction

Big data has become more widely available in neuroimaging (UK Biobank, ENIGMA, ABCD study, PNC, among others) [1], [2], [3], [4]. This has ignited a renewed interest in modelling normal brain development, to estimate quantitative brain-behaviour mappings and capture deviations from such models to derive neurobiological markers of different psychiatric disorders. These neurobiological markers could move us closer towards individualized and precision medicine [5]. Until now, the neurobiological markers for psychiatric disorders have been mostly developed with studies that used classifiers trained in a case-control setting. Counter-intuitively, an increase in sample size has shown to reduce the accuracy of classifying cases from controls for psychiatric disorders [6]. One of the main reasons for this decrease in accuracy has been posed to be the heterogeneity in the participants both biologically and behaviorally, which can only fully be captured by a large data set [6]. Normative modelling is an emerging method used to understand this heterogeneity in the population. Similar to growth charts in pediatric medicine, which describe the distribution of height or weight of children according to their age and sex, normative models can be used to model the distribution of neuroimaging derived phenotypes in a population, including the mean and centiles of variation [7], according to age, gender, or other demographic or

21 clinical variables [8]. The deviations from this normative range can be quan-  
22 tified statistically, for example as Z-scores, which have been linked to several  
23 psychiatric disorders [7], [9], [10], [11], [12], [13].

24 Although promising, there are still certain challenges in performing nor-  
25 mative modelling on big neuroimaging data. First of all, Normative models  
26 have been mainly developed using Gaussian process regression. [14]. Gaus-  
27 sian process regression is flexible and accurate, but a drawback is its com-  
28 putational complexity, which is governed by the need to compute the exact  
29 inverse of the covariance matrix. This inversion scales poorly with an in-  
30 crease in data points [15]. Therefore, using these models on large datasets  
31 requires extensive computational power and is often not feasible (typically  
32 beyond a few thousand subjects). Furthermore, most normative models as-  
33 sume the modelled distribution is Gaussian. However, distributions diverging  
34 from Gaussianity are frequently found in specific neuroimaging modalities.  
35 These non-Gaussian signals cannot be accounted for using a standard nor-  
36 mative model based on Gaussian process regression. We argue that mod-  
37 elling non-Gaussianity is important in general and is frequently overlooked  
38 by the neuroimaging community in that most regression methods used in  
39 practice –often implicitly– assume Gaussian residuals. Thus, there is a need  
40 to develop methods that can flexibly handle the computational demand and  
41 non-Gaussianity of big data sets.

42 In this paper, we propose a next-generation framework based on Bayesian  
43 linear regression (BLR) to address these challenges. We introduce an exten-  
44 sion of the BLR method for accurately modelling non-Gaussian distributions  
45 using a likelihood warping technique, giving a warped BLR model. The new  
46 framework has several benefits over previously used methods: (i) A BLR  
47 model can use a linear combination of non-linear basis functions (such as B-  
48 splines) which can be considered to provide a low-rank approximation of the  
49 Gaussian process regression models [16]. However, the BLR model has con-  
50 siderably better computational scaling, since the complexity of the model is  
51 fixed according to a set of basis-functions. Therefore, the model can be scaled  
52 much more easily to large datasets. Furthermore, a set of model coefficients  
53 can be estimated that can easily be shared without the need to share the data  
54 (e.g. to compute a cross-covariance matrix for new data points), thus mak-  
55 ing it easier to make predictions on new datasets. (ii) The non-Gaussianity  
56 of the residuals can be modelled by the flexible warping of the Gaussian  
57 function, which gives more options to model different types of neuroimaging  
58 data that cannot be accurately modelled using a standard BLR. (iii) Efficient

59 model selection criteria are naturally defined for the warped BLR through  
60 the marginal likelihood and can be calculated in closed form. The marginal  
61 likelihood gives a balance between model complexity and model fit. This can  
62 aid in choosing the optimal model for a specified imaging modality.

63 We will demonstrate this model by testing it on different types of neu-  
64 roimaging data derived from the UK Biobank dataset. The UK Biobank  
65 dataset has several magnetic resonance imaging (MRI) imaging modalities,  
66 including structural and functional brain data. With over 40,000 partici-  
67 pants' MRI data from 40 to 80 years old, this provides a rich set of differ-  
68 ent neuroimaging data and defines a benchmark for future population-based  
69 studies. In this work, we will present the warping function and recommend  
70 how to use it for several data modalities. First, we give an illustrative exam-  
71 ple using image-derived phenotypes (IDPs), which are convenient and widely  
72 used summary measures of brain function and structure [17]. Specifically, we  
73 will show a detailed example of estimating a normative model for white mat-  
74 ter hyperintensities (WMHs). WMHs have been shown before to demonstrate  
75 quite non-Gaussian behaviour [18], and are therefore a good example where  
76 the warped BLR could be preferred over the B-spline BLR. Second, we show  
77 the scalability of this method by performing a whole-brain analysis for cer-  
78 tain diffusion tensor imaging (DTI) measures. We use DTI measurements,  
79 as there are large associations with age and we expect certain non-linear and  
80 non-Gaussian trends in the data [19].

81 Finally, we want to evaluate the link between brain imaging abnormality  
82 scores and behaviour. Therefore, deviations from normal brain functioning  
83 are associated with cognitive functioning. The deviations are captured by  
84 Z-scores, which are shown to correlate with measures of intelligence in the  
85 UK Biobank dataset, such as; numerical memory, reaction time and visual  
86 memory.

87 In summary, the main contributions of the paper are to give: (i) a new  
88 comprehensive framework for big data normative modelling; (ii) the intro-  
89 duction of the novel methodological approach for modelling non-Gaussian  
90 response variables; (iii) an extensive and didactic evaluation of this frame-  
91 work on the UK Biobank cohort and (iv) a demonstration of the 'Predictive  
92 Clinical Neuroscience software toolkit' (PCNtoolkit) for big data normative  
93 modelling. Ultimately, we hope this paper will give deeper insight into the  
94 application of normative models on different types of neuroimaging modal-  
95 ities.

## 96 2. Materials and methods

### 97 2.1. Sample

98 All the data used came from the UK Biobank imaging dataset [1]. Full  
99 details on the design of the study and the preprocessing steps can be found  
100 in subsequent papers [17], [20]. Briefly, the data used contains around 10,000  
101 participants of the 2017 release and additional longitudinal data of around  
102 5,000 subjects of the 2020 release. The participants were between 40 and 80  
103 years of age, with around 47 % males.

104 In this study, two types of analyses were performed using different datasets.  
105 For the first analysis, a dataset containing IDPs was used. For consistency  
106 with existing work, the IDPs were processed using FUNPACK [21], which  
107 is an automatic normalisation, parsing and cleaning kit, developed at the  
108 Wellcome Centre for Integrative Neuroimaging. The IDPs include three  
109 main imaging modalities: structural, functional and diffusion brain imag-  
110 ing. Among these IDPs, there are very gross measures, such as the total  
111 amount of brain volume, to more detailed measurements, such as the con-  
112 nectivity between two brain regions. In total 819 neuroimaging IDPs were  
113 used for subsequent analysis, see B.1 for the list of IDPs used. Furthermore,  
114 we also tested our model on another set of IDPs; 150 FreeSurfer measures,  
115 which were preprocessed with FreeSurfer v6.1.0, using a  $T_2$ -weighted image  
116 where available, see B.1 for the list of the FreeSurfer measures used.

117 For the second analysis, a whole-brain model was built, using voxel-wise  
118 fractional anisotropy (FA) and mean diffusivity (MD) measures. The data  
119 were processed using the UKB pipelines; including the DTI fitting tool DTI-  
120 FIT and a tract-based spatial statistics (TBSS) style analysis, which gave us  
121 the skeletonised DTI files. In total, around 10,000 participants with dMRI-  
122 scans passed the quality control applied by the UK Biobank [17]. Afterwards,  
123 we added two extra exclusion criteria. First, participants were removed if  
124 their Z-score of the discrepancy between the dMRI image and the struc-  
125 tural T1 image was higher than three, based on data-field 25731 in the UK  
126 Biobank. Second, participants were removed if their Z-score of the number  
127 of outlier slices was higher than three, which is a reflection of the movement  
128 of the participant during the scan, based on data-filed 25746-2.0 in the UK  
129 Biobank. For the covariates we used age, gender and dummy coded site  
130 variables.

131 *2.2. Cognitive data*

132 We used the cognitive phenotypes that were extracted from the UK  
133 biobank using FUNPACK [21] to evaluate the cognitive associations with  
134 the deviations from the normative model. These measures are derived from  
135 the 13 cognitive tests present in the UK Biobank, see the UKB showcase. The  
136 tests were administered using a touchscreen questionnaire and included nu-  
137 merical memory, reaction time, fluid intelligence, visual memory and prospec-  
138 tive memory. Later other tests that measured executive function, declarative  
139 memory and non-verbal reasoning were added [22]. For full details on the  
140 different cognitive tests applied in UK Biobank see [23]. An overview of all  
141 the measures used in this study is presented in the supplementary E.6.

142 *2.3. Normative model formulation*

143 We use a flexible normative modelling framework to model different types  
144 of neuroimaging data. We have  $N$  subjects with brain data  $\{\mathbf{y}_n\}_{n=1}^N$ , each of  
145 dimension  $D$  (e.g. the number of voxels or IDPs) and acquired from one of  
146  $S$  different scanning sites. We use  $\mathbf{Y}$  to denote an  $N \times D$  matrix containing  
147 these variables, where  $y_{nd}$  denotes the  $n$ -th subject and  $d$ -th neuroimaging  
148 variable. Since the neuroimaging variables are estimated separately here,  
149 we simplify the notation by using  $\mathbf{y}$  to denote the vector of observations  
150 from a single variable and  $y_n$  for a single observation. In general, we want  
151 to predict the distribution of the value for each voxel or brain region, the  
152 dependent variable ( $\mathbf{y}$ ), from a set of covariates  $\{\mathbf{x}_n\}_{n=1}^N$  (e.g. age, gender or  
153 site), the independent variables. In this paper, we adopt a straightforward  
154 approach to model nonlinear relationships, by applying a basis expansion to  
155 the independent variables. A common approach is to use polynomials, but  
156 these can be a poor choice, as they can induce global curvature [24]. Here  
157 we apply a common B-spline basis expansion (specifically, cubic splines with  
158 5 evenly spaced knot points), although other approaches are also possible.  
159 We denote this expansion by  $\phi(\mathbf{x})$ , with  $\Phi$  an  $N \times K$  matrix containing the  
160 basis expansion for all subjects. In the applied model,  $y$  is assumed to be the  
161 result of a linear combination of the B-spline basis function transformation  
162 plus a noise term:

$$y = \mathbf{w}^T \phi(\mathbf{x}) + \epsilon_s \quad (1)$$

163 With  $\mathbf{w}$  the estimated vector of weights and  $\epsilon_s = \mathcal{N}(0, \beta_s^{-1})$  a Gaussian noise  
164 distribution for site  $s$ , with mean zero and a noise precision term  $\beta_s$  (i.e. the  
165 inverse variance). All the noise precision terms from the different sites will

166 be combined in a vector  $\boldsymbol{\beta}$  and the site precision matrix  $\boldsymbol{\Lambda}_{\boldsymbol{\beta}}$ , which has  $\boldsymbol{\beta}$   
167 along the leading diagonal and is the inverse of the site covariance matrix  
168  $\boldsymbol{\Lambda}_{\boldsymbol{\beta}} = \boldsymbol{\Sigma}_{\boldsymbol{\beta}}^{-1}$ . Note that we allow the noise precision to vary across sites in  
169 order to accommodate inter-site variation along with site-specific intercepts  
170 (i.e. dummy coded site regressors in the design matrix). We have shown  
171 previously that this approach provides an efficient way to accommodate site  
172 effects in normative modelling [25].

173 Following similar derivations as given by Huertas et al. [16], we consider  
174 a BLR model, placing a Gaussian prior over our model parameters  $p(\mathbf{w}|\boldsymbol{\alpha}) =$   
175  $\mathcal{N}(\mathbf{w}|0, \boldsymbol{\Lambda}_{\boldsymbol{\alpha}}^{-1})$ , with  $\boldsymbol{\alpha}$  the hyper-parameters that the weights depend on. The  
176 Gaussian prior is assumed to have a mean zero and a precision matrix  $\boldsymbol{\Lambda}_{\boldsymbol{\alpha}}$ ,  
177 with the precision matrix the inverse of the covariance matrix  $\boldsymbol{\Sigma}_{\boldsymbol{\alpha}} = \boldsymbol{\Lambda}_{\boldsymbol{\alpha}}^{-1}$ .  
178 As shown in Huertas et al. [16],  $\boldsymbol{\Lambda}_{\boldsymbol{\alpha}}$  can be quite general, but here we use a  
179 simple isotropic precision matrix  $\boldsymbol{\Lambda}_{\boldsymbol{\alpha}} = \alpha \mathbf{I}$ . The Gaussian prior choice allows  
180 us to compute the posterior distribution of  $\mathbf{w}$  in a closed form:

$$p(\mathbf{w}|\mathbf{y}, \boldsymbol{\Phi}, \boldsymbol{\alpha}, \boldsymbol{\beta}) = \frac{\text{likelihood} \times \text{prior}}{\text{marginal likelihood}} = \frac{\prod_n p(y_n|\boldsymbol{\Phi}, \boldsymbol{\beta}, \mathbf{w})p(\mathbf{w}|\boldsymbol{\alpha})}{p(\mathbf{y}|\boldsymbol{\Phi}, \boldsymbol{\alpha}, \boldsymbol{\beta})} \quad (2)$$

181 The posterior for each subject can then be found using the standard  
182 derivations of the posterior [26]:

$$\begin{aligned} p(\mathbf{w}|\mathbf{y}, \boldsymbol{\Phi}, \boldsymbol{\alpha}, \boldsymbol{\beta}) &= \mathcal{N}(\mathbf{w}|\bar{\mathbf{w}}, \mathbf{A}^{-1}) \\ \mathbf{A} &= \boldsymbol{\Phi}^T \boldsymbol{\Lambda}_{\boldsymbol{\beta}} \boldsymbol{\Phi} + \boldsymbol{\Lambda}_{\boldsymbol{\alpha}} \\ \bar{\mathbf{w}} &= \mathbf{A}^{-1} \boldsymbol{\Phi}^T \boldsymbol{\Lambda}_{\boldsymbol{\beta}} \mathbf{y} \end{aligned} \quad (3)$$

183 We use a Type II maximum likelihood approach (i.e. empirical Bayes),  
184 optimizing the denominator of the posterior to find the optimal hyper-parameters  
185  $\boldsymbol{\alpha}$  and  $\boldsymbol{\beta}$ . This gives an automatic trade-off between model fit and model com-  
186 plexity. The marginal likelihood is maximized by minimizing the negative  
187 log likelihood (NLL):

$$\begin{aligned}
 \text{NLL} &= -\log(p(\mathbf{y}|\boldsymbol{\alpha}, \boldsymbol{\beta})) \\
 &= -\log\left(\int p(\mathbf{y}|\mathbf{w}, \boldsymbol{\beta})p(\mathbf{w}|\boldsymbol{\alpha})d\mathbf{w}\right) \\
 &= -\left(\frac{N}{2}\log|\boldsymbol{\Lambda}_\beta| - \frac{ND}{2}\log 2\pi - \frac{N}{2}\log|\boldsymbol{\Lambda}_\alpha| - \frac{N}{2}\log|\mathbf{A}|\right. \\
 &\quad \left. - \frac{1}{2}\sum_{n=1}^N (\mathbf{y} - \Phi\bar{\mathbf{w}})^T \boldsymbol{\Lambda}_\beta (\mathbf{y} - \Phi\bar{\mathbf{w}}) - \bar{\mathbf{w}}^T \boldsymbol{\Lambda}_\alpha \bar{\mathbf{w}}\right) \quad (4)
 \end{aligned}$$

The optimal hyper-parameters  $\boldsymbol{\alpha}$  and  $\boldsymbol{\beta}$  are often estimated using a conjugate gradient optimisation of the NLL, where the derivatives can be computed directly. However, here we used Powell’s method to fit the hyper-parameters. Powell’s method is a derivative-free method, which in this case is faster, because computing the derivatives of the marginal likelihood with respect to the hyper-parameters is computationally very expensive. Finally, the predictive distribution is given by:

$$\hat{y} = \mathcal{N}(\bar{\mathbf{w}}^T \phi(\mathbf{x}), \phi(\mathbf{x})^T \mathbf{A}^{-1} \phi(\mathbf{x}) + \beta_s^{-1}) \quad (5)$$

188 *2.3.1. Likelihood warping*

189 In order to model non-Gaussian error distributions, we employed a ‘warped’  
 190 likelihood [27]. This involves applying a non-linear monotonic warping func-  
 191 tion  $\varphi_i$  to the input data during the model fit, with the index  $i$  indicating a  
 192 different warping function (e.g. SinArcsinh, Box-Cox etc.). This is similar  
 193 to the classical statistical technique of variable transformation, but has the  
 194 advantage that the parameters of the transformation are optimised during  
 195 model fitting, to provide the optimal mapping that ensures that model resid-  
 196 uals have a Gaussian form. The warped functions are chosen such that they  
 197 have a closed form inverse and are differentiable, which has several bene-  
 198 fits: first, non-Gaussian data can be mapped (i.e. warped) exactly to better  
 199 match Gaussian modelling assumptions or the predictions can be warped  
 200 back to the original non-Gaussian space; second, it allows inference, predic-  
 201 tion and computation of error measures all in closed form; finally, we can  
 202 construct compositions of functions from the invertible monotonic warping  
 203 functions that can greatly improve the expressivity of the model in transform-  
 204 ing non-Gaussian distributed data  $\mathbf{y}$  to a Gaussian form,  $\mathbf{z}$ , where inference  
 205 is straightforward [28]. This is done by applying a compositional warping  
 206 function  $\varphi$  to the observations  $\mathbf{y}$ :



$$\begin{aligned}\varphi(\cdot) &= \varphi_i(\varphi_{i-1}(\dots(\varphi_2(\varphi_1(\cdot))))\dots) \\ \mathbf{z} &= \varphi(\mathbf{y}; \boldsymbol{\gamma})\end{aligned}\tag{6}$$

207 With  $\boldsymbol{\gamma}$  denoting the hyper-parameter(s) of different warping functions.  
 208 The warping transformation allows us to compute error measures in the  
 209 warped space and to describe the deviations of subjects under a Gaussian  
 210 error distribution in the form of pseudo Z statistics, even if the original data  
 211 distribution is non-Gaussian.

212 The optimal hyper-parameters ( $\boldsymbol{\alpha}$ ,  $\boldsymbol{\beta}$  and  $\boldsymbol{\gamma}$ ) are calculated by minimizing  
 213 the warped NLL. The warped NLL can be found by accounting for the change  
 214 of variables in the probability density function [28]:

$$p_{\mathbf{y}}(\mathbf{y}) = p_{\mathbf{z}}(\varphi(\mathbf{y})) |\nabla \varphi(\mathbf{y})|$$

215 With  $\nabla \varphi(\cdot)$  the Jacobian of the transformation, which is diagonal and  
 216 therefore we can simplify as a product of the individual terms:

$$p_{\mathbf{y}}(\mathbf{y}) = p_{\mathbf{z}}(\varphi(\mathbf{y})) \prod_{i=1}^n \frac{d\varphi(y_n)}{dy}$$

217 If we take the negative log of this equation the warped NLL will remain  
 218 the same as equation 4, except for replacing the  $\mathbf{y}$  by the transformed  $\varphi(\mathbf{y})$   
 219 and the inclusion of the Jacobian term that takes the change of volume  
 220 induced by the warping into account, thereby ensuring a valid probability  
 221 measure, for details see [28]:

$$\begin{aligned}\text{Warped NLL} &= -\log(p(\mathbf{y}|\boldsymbol{\alpha}, \boldsymbol{\beta}, \boldsymbol{\gamma})) \\ &= \text{NLL} - \sum_{n=1}^N \log \frac{d\varphi(y_n)}{dy}\end{aligned}\tag{7}$$

### 222 2.3.2. Computational complexity

223 The optimization of the hyper-parameters is controlled by the minimiza-  
 224 tion of the warped NLL. The warped NLL consists of the basic BLR NLL

225 term and the log-derivatives of the warping  $\varphi_i$  functions, which are known  
226 in closed-form by construction. The complexity of the warped BLR model  
227 is then roughly the same as the classic BLR. However, the warped NLL is  
228 optimized for an extra hyper-parameter  $\boldsymbol{\gamma}$ , which could lead to the presence  
229 of more local minima, making the optimization process slightly slower [28].

### 230 2.3.3. Warped composition function

231 Different elementary functions can be used to create the warped compo-  
232 sition function  $\varphi$ . For this paper, we test affine, Box-Cox and SinhArcsinh  
233 transformations and compositions of these transformations:

$$\begin{aligned}\varphi_{Affine}(\mathbf{y}; \boldsymbol{\gamma}) &= a + b\mathbf{y} \\ \varphi_{Box-Cox}(\mathbf{y}; \boldsymbol{\gamma}) &= \frac{\text{sgn}(\mathbf{y})|\mathbf{y}|^\lambda - 1}{\lambda} \\ \varphi_{SinhArcsinh}(\mathbf{y}; \boldsymbol{\gamma}) &= \sinh(b * \text{arcsinh}(\mathbf{y}) - a)\end{aligned}\quad (8)$$

With  $\boldsymbol{\gamma}$  the respective parameters of the different warping functions. For the SinhArcsinh warping we also applied a reparametrization [29], as this empirically gave more stable results:

$$\begin{aligned}\varphi_{SinhArcsinh}(\mathbf{y}; \boldsymbol{\gamma}) &= \sinh(b * \text{arcsinh}(\mathbf{y}) + \epsilon * b) \\ a &= -\epsilon * b\end{aligned}$$

### 234 2.4. Model selection

We evaluate the models using different model selection criteria. First, we calculate the explained variance (EV) of the model. It is expected that the gain in fit for the warped BLR will be highly dependent on the flexibility of the model. Therefore, the Bayesian Information Criterion (BIC) is also considered:

$$BIC = k * \log(N) + 2 * NLL$$

235 Which penalises for model complexity. Here  $N$  denotes the number of partic-  
236 ipants in the training set, NLL the negative log-likelihood.  $k$  is the number of  
237 free parameters. Note that we use the marginalized form of the NLL, which  
238 already takes into account the number of estimated coefficients. Therefore,  
239 the BIC only needs to be corrected for the added complexity of the degrees

240 of freedom of the model (i.e. the parameters that are not integrated out).  
241 For the standard BLR this is two, one for the precision over the weights and  
242 one for the precision over the noise ( $\alpha$  and  $\beta$  respectively). For the warped  
243 SinArcsinh BLR two extra degrees of freedom are added for the shape param-  
244 eters ( $a$  and  $b$ ). The BIC gives a good trade-off between the extra flexibility  
245 found in the warped BLR model and the better fit of the model. Finally, the  
246 mean standardized log-likelihood (MSLL) is used as a third model criterion.  
247 The MSLL takes into account the mean error and the estimated prediction  
248 variance.

### 249 2.5. Deviance scores and correlation to cognitive phenotypes

We want to find a statistical estimate of how much each participant de-  
viates from the normal range. This is done by computing a Z-score for each  
subject  $n$ , also denoting explicitly the dependence on each voxel or IDP  $d$ :

$$z_{nd} = \frac{y_{nd} - \hat{y}_{nd}}{\sqrt{\sigma_d^2 + (\sigma_*^2)_d}} \quad (9)$$

250 With,  $\hat{y}_{nd}$  the predicted mean and  $y_{nd}$  the true response. Normalized  
251 by  $\sigma_d^2 = (\beta_s^{-1})_d$  the estimated noise variance (i.e. reflecting variation in  
252 the data) and  $(\sigma_*^2)_d = \phi(\mathbf{x})^T \mathbf{A}_d^{-1} \phi(\mathbf{x})$  the variance attributable to modelling  
253 uncertainty for the  $d$ -th voxel. For the warped statistic, we compute the  
254 Z-scores in the warped (i.e. Gaussian) space. The true response variables  
255 are warped to the Gaussian space to ensure the underlying assumption of  
256 normality is satisfied by the construction of the warping functions.

257 Afterwards, to ensure our model can also be applied for behavioural and  
258 clinical estimations, we look at the correlations between the Z-scores from  
259 the IDPs and the whole brain analysis, and the cognitive scores of the UK  
260 Biobank. For the IDPs, we directly correlate the Z-scores and the cognitive  
261 phenotypes through a Spearman correlation. For the whole-brain analysis,  
262 we first make a summary statistic of the Z-scores by calculating the extreme  
263 value distribution. We model the extreme value distribution by looking at  
264 the mean of the top 1% of the deviations across the whole brain [10]. The  
265 extreme value statistics give the largest deviations per subject from the nor-  
266 mal pattern, which have shown to be strongly correlated to behaviour [10],  
267 [30]. Afterwards, we apply a principal component analysis (PCA) on the  
268 cognitive phenotypes to give a one-factor solution. This first component has  
269 been shown to be correlated to the ‘general’ factor of cognitive ability or the

270 ‘g-factor’ [31]. Lastly, we compute the Spearman coefficient between the first  
271 principal component and the summary deviation score.

### 272 **3. Results**

#### 273 *3.1. Performance of the warped Bayesian linear regression model for IDPs*

274 All the statistical analyses were performed in Python version 3.8, using  
275 the PCNtoolkit. The BLR algorithm from the PCNtoolkit was chosen for  
276 all experiments. We considered age, binary gender and binary site ID within  
277 the covariance matrix. We used a standard BLR or we transformed the  
278 age covariate with a B-spline of order three with three knots. The Powell  
279 method was selected for the optimizer. We randomly split the dataset into  
280 50% training and 50% test and reported all the error metrics on the test  
281 set. In the PCNtoolbox, several warpings can be chosen depending on the  
282 imaging modality one wants to model. We tested several warping functions  
283 (affine, Box-Cox and SinhArcsinh) and compositions of these warping func-  
284 tions. Preliminary testing showed that the SinhArcsinh warping gave the  
285 best fit compared to the alternatives evaluated. Therefore, in this paper,  
286 only the results of the SinhArcsinh warping are presented.

287 In figure 1, Bland-Altman plots are shown comparing the standard BLR  
288 and the B-spline BLR. The figure presents different model selection criteria:  
289 MSLL and BIC (EV can be seen in supplement figure A.8). The plots demon-  
290 strate that for most IDPs a non-linear B-spline BLR model performs better  
291 than a standard BLR. Indicating that non-linearity is a key component that  
292 should be accounted for in modelling neuroimaging data.

293 In figure 2, Bland-Altman plots are shown that compare the B-spline  
294 BLR and the warped BLR models for all IDPs, using the MSLL and BIC  
295 (EV can be seen in supplement figure A.8). We also plotted the difference  
296 in absolute values of the skewness and kurtosis. In figure 3, the same plots  
297 are shown for the FreeSurfer measures. We included them separately, as  
298 they were preprocessed separately (i.e. we did not use the IDPs provided  
299 by UK Biobank and instead ran the Freesurfer reconstructions manually).  
300 The plots show that for specific IDPs the warped BLR performs better than  
301 the B-spline BLR. When we examined these IDPs more closely, it was noted  
302 that they demonstrated distinct non-Gaussian behaviour. An example of  
303 such behaviour is given down below with the WMHs (white matter hyper-  
304 intensities). In the supplementary table C.3, we provide a summary of some  
305 of the results for different IDPs that can help inform which neuroimaging

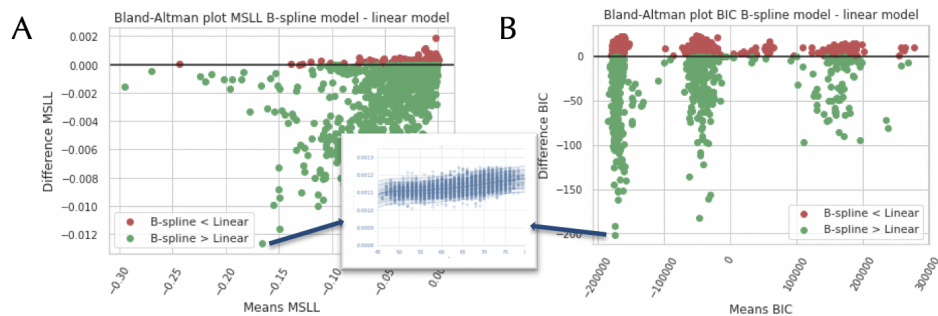

Figure 1: Bland-Altman plots comparing the standard and B-spline Bayesian Linear Regression (BLR) models, using Image-Derived Phenotypes (IDPs). Each dot indicates one IDP. The models are compared according to the following model selection criteria: the Mean Standardized Log Loss (MSLL) (A) and the Bayesian Information Criteria (BIC) (B). The green colour indicates a better fit for the non-linear B-spline model compared to the linear model. We also plotted a zoomed-in view of the model fit for one of the IDs.

306 modalities are best modelled with the warped BLR. For an indication of the  
307 effect sizes of the model selection criteria for the different model settings,  
308 see supplementary tables D.4 and D.5. Note also that the MSLL and EV  
309 do not clearly reflect differences in the shape of the predictive distribution.  
310 For example, for the IDs, there is no average difference between the warped  
311 and non-warped model (Fig. 2 panel A and supp. fig. A.8 panel B), yet  
312 the warped model consistently yields a predictive distribution –and resultant  
313 Z-score distribution– that is less (or equivalently) skewed and kurtotic (Fig.  
314 2 panels C and D).

315 In figure 4 and 5, we show the results of an illustrative analysis predicting  
316 WMH load across ageing to demonstrate how the performance of the warped  
317 BLR model compares to a B-spline BLR. The figures show the B-spline BLR  
318 and warped BLR results for WMHs at one-time point and the longitudinal  
319 data of two-time points. The results demonstrate that (i) the non-linearity  
320 of the data is sufficiently captured with a B-spline transformed BLR (ii)  
321 the WMHs show a distinctly non-Gaussian variance pattern, which is better  
322 predicted by the warped BLR. Thus, indicating that if the data has a non-  
323 Gaussian distribution for the residuals a warped BLR is preferred over a  
324 B-spline BLR.

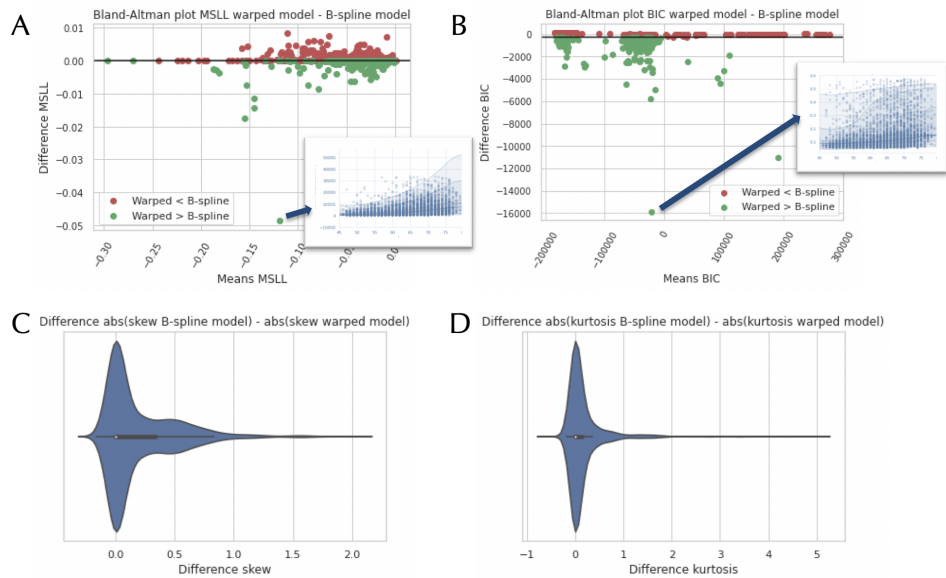

Figure 2: Bland-Altman plots comparing the B-spline and warped Bayesian Linear Regression (BLR) models, using Image-Derived Phenotypes (IDPs). The models are compared according to the following model selection criteria: the Mean Standardized Log Loss (MSLL) (A) and the Bayesian Information Criteria (BIC) (B). The green colour indicates a better fit for the warped model compared to the B-spline model. We also plotted a zoomed-in view of the model fit for two of the IDPs. On images C and D, we show the difference in absolute values of the skewness and kurtosis between the B-spline and warped model. A more positive value indicates that the B-spline model had a higher skewness or kurtosis than the warped model.

### 3.1.1. Correlation deviance scores WMHs and cognitive phenotypes

We also wanted to correlate the warped BLR model output of the WMHs to behavioural variables to ensure that the model can be used for behavioural predictions. We loaded all cognitive phenotypes available in UK Biobank according to the FUNPACK categorization, including: reaction time, numeric memory, prospective memory etc. (for a full list of the cognitive phenotypes used, see the supplementary table E.6). We calculated the deviance Z-scores according to formula 9. Afterwards, we calculated the Spearman correlation between the cognitive phenotypes and the Z-scores. Numeric memory (ID: 4259, 'Digits entered correctly') was modestly but significantly correlated with the warped Z-scores:  $\rho = -0.0331$ ,  $p = 0.0262$ . In other words, if a participant's WMH deviation from normal development increases the number of

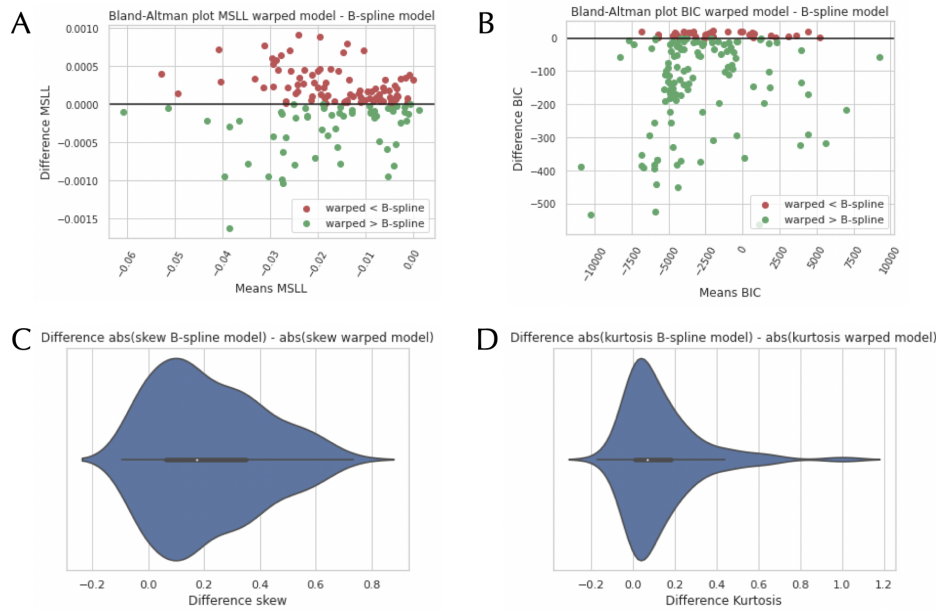

Figure 3: Bland-Altman plots comparing the B-spline and warped Bayesian Linear Regression (BLR) models, using the FreeSurfer measurements. The models are compared according to the following model selection criteria: the Mean Standardized Log Loss (MSSL) (A) and the Bayesian Information Criteria (BIC) (B). We also plotted a zoomed-in view of the model fit for one of the IDPs. On images C and D, we show the difference in absolute values of the skewness and kurtosis between the B-spline and warped model. A more positive number means a better fit for the warped model compared to the B-spline model.

337 correctly remembered digits drops.

338 Lastly, to illustrate the value of normative models in a longitudinal con-  
339 text, we tested for an association between change in WMHs and change in  
340 cognitive phenotypes of the longitudinal data to see if WMH load is corre-  
341 lated to cognitive decline. We performed a statistical Wilcoxon rank-sum  
342 test on the participants' cognitive phenotypes contrasting subjects that have  
343 a difference in the Z-scores  $> 0.5$ , which corresponds to a difference in half  
344 a standard deviation, versus the participants that do not. Intuitively, this  
345 contrasts individuals who are following an expected trajectory of ageing with  
346 those who deviate from such a trajectory. Highly significant associations were  
347 found with the reaction time (ID: 404, 'Duration to first press of snap-button  
348 in each round')  $W = 5.5641$ ,  $p < 0.001$  and with the Trail Making Test (ID:

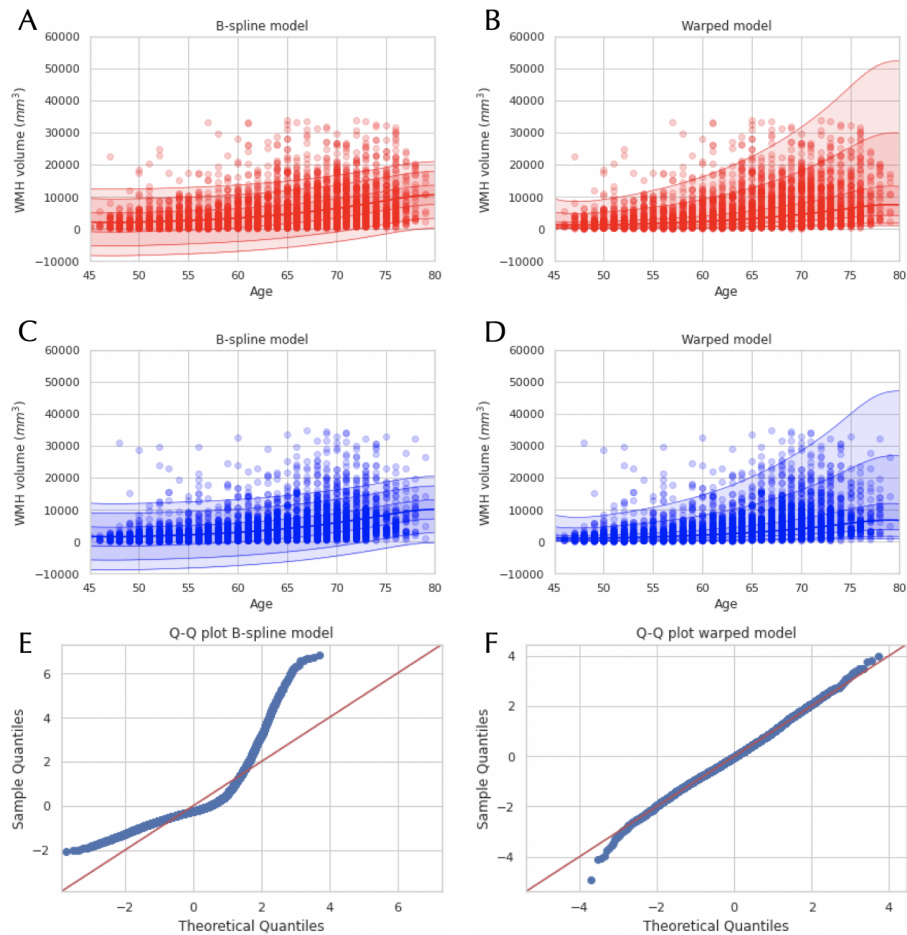

Figure 4: White matter hyperintensities (WMHs) modelled as a function of age using a Bayesian Linear Regression (BLR) model. Images A and C demonstrate the model fit using a regular Gaussian B-spline BLR, for the female and male cohorts respectively, both visualizing the mean prediction and the centiles of variation for the WMHs. Images B and D show comparable fits for a SinArcsinh warped BLR, for the female and male cohorts respectively. In images E and F quantile-quantile (QQ) plots of the two models are shown, demonstrating a better fit for the data using a warped BLR model.

349 6771, 'Errors before selecting correct item in alphanumeric path (trail #2)'  
350  $W = 8.3105$ ,  $p < 0.001$ . The results show an association between the change  
351 in cognition and the change in WMH deviance scores.



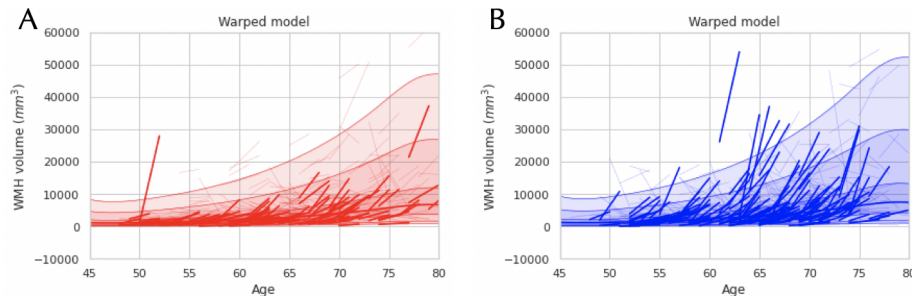

Figure 5: Here the longitudinal follow-up data of the WMHs is plotted for females (A) and males (B), using a SinhArcsinh warped BLR model.

### 352 3.2. Scalability to a whole brain voxelwise based analysis

353 For the follow-up analysis, we evaluated the warped BLR approach on a  
354 whole-brain level for two DTI imaging modalities (FA and MD). The results  
355 of these two modalities were very similar and therefore we will only present  
356 the results for FA here. We separated the entire dataset into 80% training  
357 data and 20% testing data. First, we computed the time complexity per  
358 model fit (e.g. for one voxel) with varying number of subjects using the B-  
359 spline BLR model setting and compared it to the Gaussian process regression  
360 setting (Figure 6). This demonstrates the clear computational advantage of  
361 the BLR setting for the whole brain analysis.

362 Afterwards, we tested different model settings for the imaging modalities  
363 including a standard BLR, B-spline BLR and a SinhArcsinh warped BLR.  
364 Figure 7 shows the comparative results in a Bland-Altman plot for the FA  
365 dataset (which were similar for the MD dataset). The figure presents the  
366 EV, MSL and the BIC for the B-spline BLR and the warped BLR. These  
367 results are consistent with the IDPs in that according to the EV and MSL,  
368 the models perform quite similarly for most voxels. Although, we would  
369 argue that these measures are not necessarily sensitive for the added benefit  
370 of the warping of the likelihood, which will mostly affect the predictions in  
371 the outer centiles. For the BIC the results demonstrate that the warped BLR  
372 is preferred for certain voxels. The voxels where a warped model is favoured  
373 generally showed more non-Gaussian behaviour.

374 Finally, We used a paired-sample t-test, pairing the whole brain results  
375 (EV, MSL and BIC) of the different models to estimate the difference be-  
376 tween performance measures of the warped and non-warped BLR. For MD

377 the following effect sizes were found:  $EV : d = 0.33$ ,  $MSLL : d = 0.003$   
378 and  $BIC : d = -0.79$ . For FA the following effect sizes were found:  $EV :$   
379  $d = 0.028$ ,  $MSLL : d = 0.017$  and  $BIC : d = 0.55$ . We can see that the  
380 difference between the methods is small. Indicating that the B-spline BLR  
381 and the warped BLR model are quite similar in their model fit for MD and  
382 FA.

### 383 3.2.1. Correlation deviance scores DTI and cognitive phenotypes

384 Finally, we correlated the Z-scores of the whole brain warped BLR model  
385 for the MD dataset to the cognitive phenotypes. First, we scaled the cognitive  
386 data and performed a principal component analysis. We selected the first  
387 component, which explained 29% of the variance in the data. Afterwards,  
388 we made a summary score of the Z-scores for each participant by looking  
389 at the largest deviations, which in the limit should follow an extreme value  
390 distribution [32]. We fitted a generalized extreme value distribution to the  
391 top 1% of the absolute Z-scores of each subject. Subsequently, we computed  
392 a Spearman correlation between the extreme values and the first principal  
393 component of the cognitive phenotypes, which gave  $\rho = 0.158$ ,  $p < 0.001$ .  
394 The results demonstrate a clear correlation between the warped deviations  
395 from normal development and the cognitive phenotypes. This relationship  
396 will be explored further in future studies.

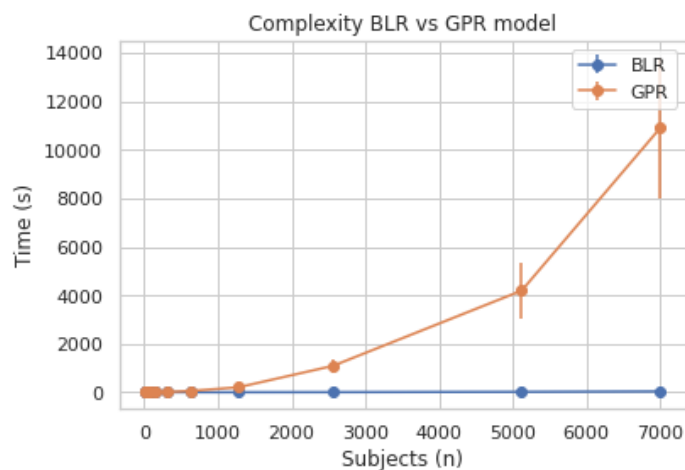

Figure 6: Computational complexity comparison between the Bayesian linear regression (BLR) model setting and the Gaussian process regression (GPR) model setting, giving the mean and the standard error (SE) over ten runs.

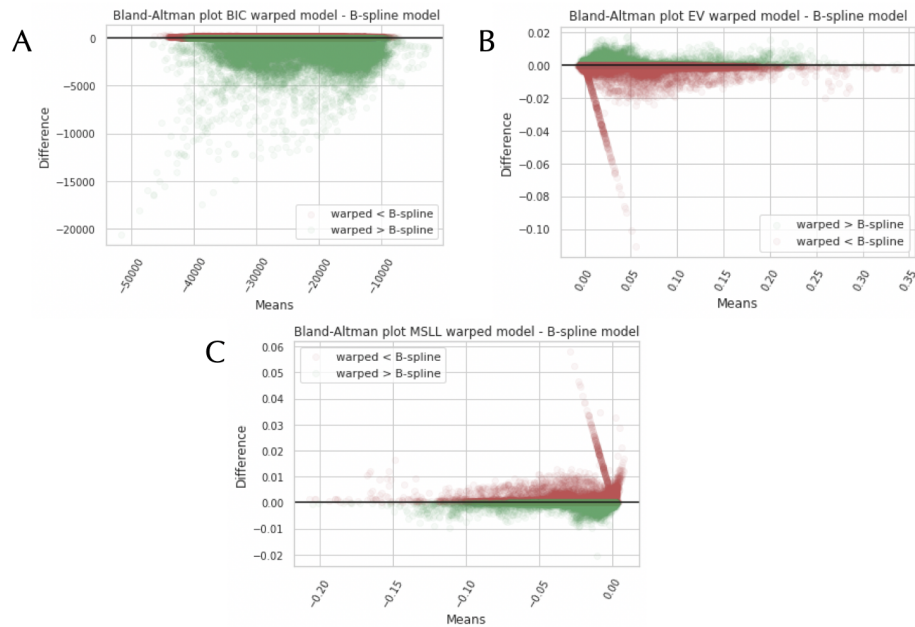

Figure 7: Bland-Altman plots comparing the warped Bayesian Linear Regression (BLR) model to the B-spline BLR model, using Fractional Anisotropy (FA) data. The comparison is done according to the following model selection criteria: The Bayesian Information Criteria (BIC) (A), the Explained Variance (EV) (B), and the Mean Standardized Log Loss (MSLL) (C). The green colour indicates a better fit for the warped BLR.

#### 397 4. Discussion

398 In this paper, we presented a next-generation framework to scale norma-  
399 tive models for large population-sized datasets based on warped Bayesian  
400 linear regression (BLR). Normative models can capture the heterogeneity  
401 in the population and model individual deviations from normal brain de-  
402 velopment. We demonstrated that the shift in normative modelling to a  
403 B-spline BLR with a likelihood warping gives several benefits. In this study  
404 we showed that: (i) Compared to Gaussian process regression, it is compu-  
405 tationally much less demanding and is therefore scalable to big datasets. (ii)  
406 The non-linearity of the model, incorporated by the B-spline, improves the  
407 fit and out of sample predictions for most variables. (iii) Non-Gaussianity  
408 of the data can be naturally included due to the incorporation of the likeli-  
409 hood warping in the algorithm, which allows for a wider range of datasets to  
410 be accurately modelled. (iv) Model selection criteria based on the marginal

411 likelihood, such as the BIC, can be calculated in closed form and therefore  
412 a trade-off between model fit and model complexity can be chosen opti-  
413 mally from the training data, without cross-validation. (v) The deviations  
414 scores from normal brain development can be meaningfully related to be-  
415 haviour. Furthermore, we demonstrated the use of the normative model  
416 with the warped BLR on different datasets from the UK Biobank, including  
417 image-derived phenotypes (IDPs); focusing on white matter hyperintensities  
418 (WMHs) as an example of non-Gaussianity and a diffusion tensor imaging  
419 (DTI) modality for a whole-brain model.

420 Our proposed method makes it possible to apply normative modelling to  
421 considerably larger samples than was feasible before [7], [8]. The results from  
422 the computational experiments on the whole brain model showed that the  
423 BLR method is scalable to population-sized data sets and fine-grained voxel-  
424 level data. In comparison, most normative models used Gaussian process  
425 regression, which due to its high computational complexity could only be  
426 used in studies with a relatively low sample size. This improvement is mainly  
427 because the approximation of the covariance matrix by a set of basis functions  
428 allowed us to account for non-linearity in a computationally less demanding  
429 way than the Gaussian process regression method, therefore making the B-  
430 spline BLR scalable for big datasets. Computationally scalable modelling  
431 of nonlinear effects is important since our experiments showed that a cubic  
432 B-spline transformation of the age covariate improved model fit compared to  
433 linear models for most neuroimaging modalities.

434 Another major benefit of our method is the possibility of modelling non-  
435 Gaussian distribution by the use of the likelihood warping technique. This  
436 is important in general, as the aim of normative modelling is to accurately  
437 model the centiles of variation in addition to modelling the mean and is  
438 especially important for normative modelling of variables that are not ap-  
439 proximately Gaussian distributed. For example, we showed that the WMHs  
440 show non-Gaussian behaviour that is well suited to uncover the benefits of  
441 the warped model over the standard model. We demonstrated the improved  
442 fit of the WMHs by including a B-spline transformation and a SinhArcsinh  
443 likelihood warping in the normative model, which was also exemplified for  
444 the longitudinal data. The same improvement in fit for other data modalities  
445 that showed more non-Gaussianity in their residuals was also demonstrated  
446 by comparing the warped BLR to the B-spline BLR for all the IDPs. Fur-  
447 thermore, it was shown on a whole-brain model of a DTI modality that for  
448 several voxels the warped BLR gives a better model performance than a

449 B-spline BLR.

450 We emphasize that the addition of non-linear effects and non-gaussianity  
451 makes the model more flexible which increase the need for model selection  
452 in order to avoid possible overfitting. We presented several model selection  
453 criteria that can be used to choose the optimal model settings for different  
454 neuroimaging modalities. It should be recognized that for some IDPs and  
455 voxels the B-spline BLR gives a better fit, showing that a more flexible  
456 model is not always needed. Therefore, we recommend carefully examining  
457 the type of data one wants to model and based on the data trends found  
458 for the residuals (Gaussian or non-Gaussian) to decide if a more flexible  
459 model is preferred. This can easily be checked by looking at the skewness  
460 and kurtosis of the distribution or making a QQ-plot. Additionally, different  
461 model selection criteria can sometimes contradict each other, as they are  
462 sensitive to different parts of the data. As we showed above, classical metrics  
463 such as EV and MSLL are not very sensitive to the shape of the predictive  
464 distribution. The consequence is that per task, we have to decide if we  
465 want a better EV, most sensitive to the mean fit and dependent on the  
466 flexibility of the model, or a better MSLL/BIC, which is more sensitive to  
467 the variance and penalizes the flexibility of the model. The variability in  
468 model selection criteria demonstrates that for different imaging modalities,  
469 different normative modelling settings are preferred and the added flexibility  
470 is confirmed to only give an advantage for response variables that show non-  
471 Gaussianity in their residuals.

472 We confirmed that the deviations from the normative modelling frame-  
473 work can be meaningfully related to behaviour. We established a significant  
474 correlation between the warped deviance scores from the IDPs and several  
475 dimensions of the intelligence phenotype. These tests give a first indication  
476 of the possible relationships between the deviations and behaviour. For the  
477 whole brain model, the relationship with behaviour was shown with a sig-  
478 nificant correlation between an approximation to the g-factor in the form of  
479 the first principal component of the cognitive phenotypes and the warped  
480 deviance scores. This study demonstrates that the model could be extended  
481 to make predictive scores not only in the brain domain, but also for the be-  
482 havioural phenotype. In the future, the neurobiological markers of deviation  
483 from normal development can be extended to become markers of psychiatric  
484 disorders. This has already been done on a smaller scale, using normative  
485 modelling [9], [10], [13], [30], [33], [34], but we would like to extend these  
486 studies to bigger data models, which include a wide variety of neuroimaging

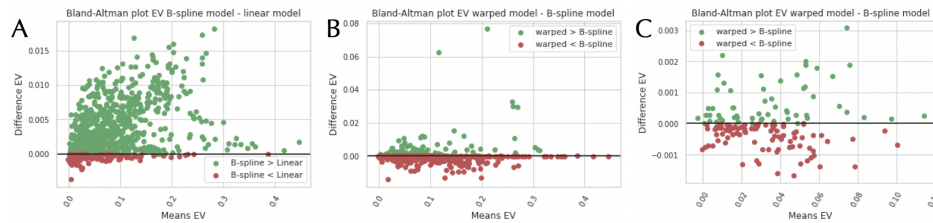

Figure A.8: Bland-Altman plots of the Explained Variance (EV): Figure A shows the comparison of the linear and B-spline model, using the IDPs. Figure B shows the comparison of the warped and B-spline model, using the IDPs. Figure C shows the comparison of the warped and B-spline model, using the FreeSurfer measurements.

487 data modalities.

488 In conclusion, the current study suggests that non-linearity and non-  
489 Gaussianity are two parameters of big neuroimaging datasets that need to  
490 be captured to make accurate predictions for normal brain development. In  
491 this paper, we have done that through a warped BLR normative model.  
492 We have shown using several neuroimaging modalities the benefit of this  
493 model over more conservative models. Caution is essential when applying  
494 non-Gaussian models, as they can overfit and should mainly be used in the  
495 presence of non-normally distributed residuals. We recommend carefully  
496 assessing the distribution of residuals and the model selection parameters  
497 using the different model selection criteria mentioned in this paper that give  
498 a balance between model complexity and model fit.

## 499 Appendix A.

500 Figure A.8 shows the Bland-Altman plots of the explained variance for the  
501 IDPs and FreeSurfer measurements comparing the different model settings.

## 502 Appendix B.

503 An example list of the IDPs, processed using FUNPACK (the FMRIB  
504 UKBiobank Normalisation, Parsing And Cleaning Kit), used in this study  
505 is given in B.1. The IDPs contained the following neuroimaging modalities  
506 [17]:

- 507 1. T1, from which the total brain volumes are calculated.

Table B.1: Example list of the IDP field names, processed using FUNPACK (the FMRIB UKBiobank Normalisation, Parsing And Cleaning Kit).

|                                                                      |
|----------------------------------------------------------------------|
| Volumetric scaling from T1 head image to standard space              |
| Volume of white matter                                               |
| Median T2star in thalamus (left)                                     |
| Mean FA in middle cerebellar peduncle on FA skeleton                 |
| Mean MD in middle cerebellar peduncle on FA skeleton                 |
| Mean MO in fornix on FA skeleton                                     |
| Mean L1 in body of corpus callosum on FA skeleton                    |
| Mean L2 in cerebral peduncle on FA skeleton (right)                  |
| Mean L2 in cerebral peduncle on FA skeleton (right)                  |
| Mean OD in posterior limb of internal capsule on FA skeleton (right) |
| Mean ISOVF in splenium of corpus callosum on FA skeleton             |
| Weighted-mean FA in tract acoustic radiation (left)                  |
| Weighted-mean MD in tract corticospinal tract (right)                |
| Weighted-mean MO in tract acoustic radiation (right)                 |
| Weighted-mean L1 in tract acoustic radiation (left)                  |
| Weighted-mean L2 in tract acoustic radiation (left)                  |
| Discrepancy between T2 FLAIR brain image and T1 brain image          |
| Volume of grey matter in Frontal Pole (left)                         |

- 508 2. Resting-state fMRI, from which the apparent connectivity between cer-  
509 tain brain regions is estimated.
- 510 3. Task fMRI, from which the strength of response to certain tasks is  
511 given, which can be related to higher cognitive functioning.
- 512 4. T2 Flair, from which the white matter lesions are estimated.
- 513 5. DMRI, from which the DTI measures such as FA and MD are calcu-  
514 lated.
- 515 6. Susceptibility-weighted imaging (SWI), from which venous vasculature,  
516 microbleed and other aspects of microstructure are estimated.

## 517 Appendix C.

518 We computed the differences between the BICs of a B-spline BLR and  
519 a warped BLR. Afterwards, we selected the top 30 IDPs where the B-spline  
520 model had the lowest BIC comparatively to the warped score or the other

521 way around. In table C.2 the model selection criteria of the top 30 best-fitted  
522 IDPs with the B-spline BLR compared to the warped BLR are shown. In  
523 table C.3 the model selection criteria of the top 30 best-fitted IDPs with the  
524 warped BLR compared to the B-spline BLR shown. These tables demon-  
525 strate that every neuroimaging modality has its optimal model settings and  
526 that one should carefully examine the model selection criteria and shape of  
527 the response distribution, before choosing a model.

## 528 **Appendix D.**

529 We used a paired-sample t-test, pairing the IDP results (EV, MSLI and  
530 BIC) of the different models to estimate the difference between performance  
531 measures of the warped and non-warped BLR. In table D.4 and D.5 the  
532 Cohen’s d effect sizes and p-values are reported. The results show that there  
533 is a large difference between the standard BLR and the B-spline BLR, which  
534 confirms that one should take into account the non-linearity of the data.  
535 For the warped BLR and the B-spline BLR model, there is only a significant  
536 difference in the BIC score. We argue that this is because the model selection  
537 criteria are not necessarily sensitive to the deviations in the residuals from  
538 normality. Therefore, we also recommend to, alongside the model selection  
539 criteria, look at the skewness and kurtosis values together with the QQ-plot  
540 to choose the optimal model settings for each modality.

## 541 **Appendix E.**

542 In table E.6 we listed the cognitive variables from the UK Biobank that  
543 were used in this study with their IDs.

## 544 **References**

- 545 [1] C. Sudlow, J. Gallacher, N. Allen, V. Beral, P. Burton, J. Danesh,  
546 P. Downey, P. Elliott, J. Green, M. Landray, et al., Uk biobank: an  
547 open access resource for identifying the causes of a wide range of com-  
548 plex diseases of middle and old age, *Plos med* 12 (2015) e1001779.  
549 doi:10.1371/journal.pmed.1001779.
- 550 [2] P. M. Thompson, J. L. Stein, S. E. Medland, D. P. Hibar, A. A. Vasquez,  
551 M. E. Renteria, R. Toro, N. Jahanshad, G. Schumann, B. Franke, et al.,



| EV    | MSLL   | BIC         | Field                                                                                   |
|-------|--------|-------------|-----------------------------------------------------------------------------------------|
| 0.206 | -0.115 | -166562.002 | Mean MD in superior fronto-occipital fasciculus on FA skeleton (right)                  |
| 0.134 | -0.072 | -46220.575  | Mean ISOVF in genu of corpus callosum on FA skeleton                                    |
| 0.025 | -0.013 | -12455.567  | Mean MO in superior fronto-occipital fasciculus on FA skeleton (left)                   |
| 0.159 | -0.087 | -163761.463 | Mean L2 in superior fronto-occipital fasciculus on FA skeleton (right)                  |
| 0.148 | -0.08  | -176269.475 | Mean MD in external capsule on FA skeleton (right)                                      |
| 0.17  | -0.093 | -40955.602  | Discrepancy between T1 brain image and standard-space brain template (linearly-aligned) |
| 0.074 | -0.039 | -52218.319  | Mean ISOVF in anterior limb of internal capsule on FA skeleton (left)                   |
| 0.066 | -0.034 | -50151.283  | Mean ISOVF in anterior limb of internal capsule on FA skeleton (right)                  |
| 0.135 | -0.072 | -175704.326 | Mean L3 in external capsule on FA skeleton (right)                                      |
| 0.202 | -0.113 | -32491.645  | Mean ICVF in superior fronto-occipital fasciculus on FA skeleton (right)                |
| 0.077 | -0.04  | -99708.396  | Inverted temporal signal-to-noise ratio in pre-processed tfMRI                          |
| 0.188 | -0.104 | -171678.769 | Mean MD in anterior corona radiata on FA skeleton (left)                                |
| 0.265 | -0.154 | -176057.846 | Weighted-mean MD in tract anterior thalamic radiation (left)                            |
| 0.078 | -0.041 | -44211.387  | Mean ISOVF in superior fronto-occipital fasciculus on FA skeleton (left)                |
| 0.143 | -0.077 | -59646.162  | Weighted-mean ISOVF in tract anterior thalamic radiation (right)                        |
| 0.177 | -0.098 | -172620.769 | Mean MD in anterior corona radiata on FA skeleton (right)                               |
| 0.273 | -0.16  | -176331.153 | Weighted-mean MD in tract anterior thalamic radiation (right)                           |
| 0.174 | -0.096 | -170432.707 | Mean L2 in anterior corona radiata on FA skeleton (right)                               |
| 0.054 | -0.028 | 101219.506  | Volume of grey matter in Pallidum (right)                                               |
| 0.175 | -0.096 | -169471.163 | Mean MD in genu of corpus callosum on FA skeleton                                       |
| 0.229 | -0.13  | -175866.701 | Weighted-mean L2 in tract anterior thalamic radiation (right)                           |
| 0.163 | -0.089 | -177074.476 | Mean MD in anterior limb of internal capsule on FA skeleton (left)                      |
| 0.079 | -0.041 | -53234.386  | Mean ISOVF in posterior corona radiata on FA skeleton (left)                            |
| 0.159 | -0.087 | -58912.836  | Weighted-mean ISOVF in tract anterior thalamic radiation (left)                         |
| 0.04  | -0.02  | -25966.018  | Mean ICVF in fornix on FA skeleton                                                      |
| 0.076 | -0.04  | -56374.466  | Mean ISOVF in anterior corona radiata on FA skeleton (left)                             |
| 0.14  | -0.075 | -55319.609  | Weighted-mean OD in tract superior thalamic radiation (left)                            |
| 0.076 | -0.039 | -57122.197  | Weighted-mean ISOVF in tract superior longitudinal fasciculus (left)                    |
| 0.039 | -0.02  | -57205.686  | Mean ISOVF in anterior corona radiata on FA skeleton (right)                            |
| 0.103 | -0.054 | -51036.79   | Mean ISOVF in posterior corona radiata on FA skeleton (right)                           |

Table C.2: Model selection criteria of the top 30 IDPs, ranked according to difference between the BIC of a B-spline BLR and a SinhArcsinh warped BLR, where the B-spline BLR had a lower BIC score.

| EV    | MSLL   | BIC         | Field                                                                       |
|-------|--------|-------------|-----------------------------------------------------------------------------|
| 0.249 | -0.143 | 184900.524  | Total volume of white matter hyperintensities (from T1 and T2-FLAIR images) |
| 0.147 | -0.079 | -29710.013  | Mean OD in fornix on FA skeleton                                            |
| 0.285 | -0.164 | -137192.133 | Mean MD in fornix on FA skeleton                                            |
| 0.276 | -0.153 | -136161.29  | Mean L3 in fornix on FA skeleton                                            |
| 0.275 | -0.151 | -134595.545 | Mean L2 in fornix on FA skeleton                                            |
| 0.153 | -0.083 | -87376.141  | Inverted temporal signal-to-noise ratio in pre-processed rfMRI              |
| 0.27  | -0.157 | -24636.152  | Mean FA in fornix on FA skeleton                                            |
| 0.171 | -0.093 | -32985.173  | Mean MO in anterior limb of internal capsule on FA skeleton (right)         |
| 0.094 | -0.049 | -22330.216  | Mean MO in tapetum on FA skeleton (left)                                    |
| 0.043 | -0.022 | -26681.768  | Mean MO in tapetum on FA skeleton (right)                                   |
| 0.141 | -0.076 | -33305.028  | Mean MO in anterior limb of internal capsule on FA skeleton (left)          |
| 0.054 | -0.027 | -42459.737  | Weighted-mean ISOVF in tract parahippocampal part of cingulum (left)        |
| 0.117 | -0.062 | -71451.215  | Mean OD in splenium of corpus callosum on FA skeleton                       |
| 0.064 | -0.033 | -40476.534  | Weighted-mean FA in tract parahippocampal part of cingulum (right)          |
| 0.307 | -0.183 | -15506.712  | Mean ISOVF in fornix on FA skeleton                                         |
| 0.182 | -0.1   | -34039.973  | Discrepancy between T2 FLAIR brain image and T1 brain image                 |
| 0.047 | -0.024 | -41660.315  | Weighted-mean FA in tract parahippocampal part of cingulum (left)           |
| 0.058 | -0.03  | -51125.932  | Mean OD in tapetum on FA skeleton (left)                                    |
| 0.199 | -0.111 | -172072.977 | Weighted-mean MD in tract posterior thalamic radiation (left)               |
| 0.311 | -0.186 | -26746.982  | Discrepancy between tfMRI brain image and T1 brain image                    |
| 0.131 | -0.071 | -169248.259 | Mean MD in posterior thalamic radiation on FA skeleton (left)               |
| 0.089 | -0.046 | -181090.417 | Mean MD in inferior cerebellar peduncle on FA skeleton (left)               |
| 0.07  | -0.036 | -41654.584  | Weighted-mean ISOVF in tract parahippocampal part of cingulum (right)       |
| 0.028 | -0.014 | -35788.551  | Mean MO in posterior limb of internal capsule on FA skeleton (right)        |
| 0.069 | -0.036 | -62423.772  | Weighted-mean OD in tract forceps major                                     |
| 0.027 | -0.014 | -52538.461  | Mean ISOVF in middle cerebellar peduncle on FA skeleton                     |
| 0.314 | -0.188 | -27837.003  | Discrepancy between rfMRI brain image and T1 brain image                    |
| 0.085 | -0.044 | -170720.346 | Weighted-mean MD in tract medial lemniscus (right)                          |

Table C.3: Model selection criteria of the top 30 IDPs, ranked according to the difference between the BIC of a B-spline BLR and a SinhArcsinh warped BLR, where the SinhArcsinh warped BLR had a lower BIC score.

- 552 The enigma consortium: large-scale collaborative analyses of neuroimag-  
 553 ing and genetic data, *Brain imaging and behavior* 8 (2014) 153–182.  
 554 doi:10.1007/s11682-013-9269-5.
- 555 [3] B. Casey, T. Cannonier, M. I. Conley, A. O. Cohen, D. M. Barch, M. M.  
 556 Heitzeg, M. E. Soules, T. Teslovich, D. V. Dellarco, H. Garavan, et al.,  
 557 The adolescent brain cognitive development (abcd) study: imaging ac-  
 558 quisition across 21 sites, *Developmental cognitive neuroscience* 32 (2018)  
 559 43–54. doi:10.1016/j.dcn.2018.03.001.
- 560 [4] T. D. Satterthwaite, J. J. Connolly, K. Ruparel, M. E. Calkins, C. Jack-  
 561 son, M. A. Elliott, D. R. Roalf, R. Hopson, K. Prabhakaran, M. Behr,  
 562 et al., The philadelphia neurodevelopmental cohort: A publicly avail-  
 563 able resource for the study of normal and abnormal brain development in  
 564 youth, *Neuroimage* 124 (2016) 1115–1119. doi:10.1016/j.neuroimage.  
 565 2015.03.056.
- 566 [5] T. R. Insel, B. N. Cuthbert, Brain disorders? Precisely: Precision  
 567 medicine comes to psychiatry, *Science* 348 (2015) 499–500. doi:10.1126/  
 568 science.aab2358.

| Criteria | t       | p           | d      |
|----------|---------|-------------|--------|
| EV       | 27.511  | $p < 0.001$ | 0.922  |
| MSLL     | -26.538 | $p < 0.001$ | -0.889 |
| BIC      | -15.95  | $p < 0.001$ | -0.534 |

Table D.4: Table presenting a paired-sample t-test between the B-spline and standard BLR models, using the IDP data, showing a significant difference between the model selection criteria of the B-spline BLR and the standard BLR, with a large effect size.

| Criteria | t      | p           | d     |
|----------|--------|-------------|-------|
| EV       | -0.897 | 0.37        | -0.03 |
| MSLL     | 0.026  | 0.979       | 0.001 |
| BIC      | 9.279  | $p < 0.001$ | 0.311 |

Table D.5: Table presenting a paired-sample t-test between the B-spline and warped BLR models, using the IDP data, showing only a significant difference between the model selection criteria of the B-spline BLR and the B-spline SinhArcsinh warped BLR using the BIC score, with a small effect size.

Table E.6: Cognitive variables of the UK Biobank that were used in this study.

| Field                                                                          | FieldID |
|--------------------------------------------------------------------------------|---------|
| Number of times snap-button pressed                                            | 403     |
| Duration to first press of snap-button in each round                           | 404     |
| Mean time to correctly identify matches                                        | 20023   |
| Time elapsed                                                                   | 4256    |
| Digits entered correctly                                                       | 4259    |
| Number of rounds of numeric memory test performed                              | 4283    |
| Time to complete test                                                          | 4285    |
| Duration screen displayed                                                      | 4290    |
| Number of attempts                                                             | 4291    |
| Prospective memory result                                                      | 20018   |
| Fluid intelligence score                                                       | 20016   |
| Number of fluid intelligence questions attempted within time limit             | 20128   |
| Duration to complete numeric path (trail 1)                                    | 6348    |
| Total errors traversing numeric path (trail 1)                                 | 6349    |
| Duration to complete alphanumeric path (trail 2)                               | 6350    |
| Total errors traversing alphanumeric path (trail 2)                            | 6351    |
| Errors before selecting correct item in numeric path (trail 1)                 | 6770    |
| Errors before selecting correct item in alphanumeric path (trail 2)            | 6771    |
| Interval between previous point and current one in numeric path (trail 1)      | 6772    |
| Interval between previous point and current one in alphanumeric path (trail 2) | 6773    |
| Number of puzzles correctly solved                                             | 6373    |
| Number of puzzles viewed                                                       | 6374    |
| Number of puzzles correct                                                      | 6382    |
| Number of puzzles attempted                                                    | 6383    |
| Number of puzzles correct                                                      | 21004   |
| Number of symbol digit matches attempted                                       | 23323   |
| Number of symbol digit matches made correctly                                  | 23324   |

- 569 [6] T. Wolfers, J. K. Buitelaar, C. F. Beckmann, B. Franke, A. F. Mar-  
570 quand, From estimating activation locality to predicting disorder: A  
571 review of pattern recognition for neuroimaging-based psychiatric diag-  
572 nostics, 2015. doi:10.1016/j.neubiorev.2015.08.001.
- 573 [7] A. F. Marquand, S. M. Kia, M. Zabihi, T. Wolfers, J. K. Buitelaar,  
574 C. F. Beckmann, Conceptualizing mental disorders as deviations from  
575 normative functioning, 2019. doi:10.1038/s41380-019-0441-1.
- 576 [8] A. F. Marquand, I. Rezek, J. Buitelaar, C. F. Beckmann, Understanding  
577 Heterogeneity in Clinical Cohorts Using Normative Models: Beyond  
578 Case-Control Studies, *Biological Psychiatry* 80 (2016a) 552–561. doi:10.  
579 1016/j.biopsych.2015.12.023.
- 580 [9] T. Wolfers, N. T. Doan, T. Kaufmann, D. Alnæs, T. Moberget,  
581 I. Agartz, J. K. Buitelaar, T. Ueland, I. Melle, B. Franke, O. A. An-  
582 dreassen, C. F. Beckmann, L. T. Westlye, A. F. Marquand, Map-  
583 ping the Heterogeneous Phenotype of Schizophrenia and Bipolar Disor-  
584 der Using Normative Models, *JAMA Psychiatry* 75 (2018) 1146–1155.  
585 doi:10.1001/jamapsychiatry.2018.2467.
- 586 [10] M. Zabihi, M. Oldehinkel, T. Wolfers, V. Frouin, D. Goyard, E. Loth,  
587 T. Charman, J. Tillmann, T. Banaschewski, G. Dumas, R. Holt,  
588 S. Baron-Cohen, S. Durston, S. Bölte, D. Murphy, C. Ecker, J. K. Buite-  
589 laar, C. F. Beckmann, A. F. Marquand, Dissecting the Heterogeneous  
590 Cortical Anatomy of Autism Spectrum Disorder Using Normative Mod-  
591 els, *Biological Psychiatry: Cognitive Neuroscience and Neuroimaging* 4  
592 (2019) 567–578. doi:10.1016/j.bpsc.2018.11.013.
- 593 [11] T. Kaufmann, D. van der Meer, N. T. Doan, E. Schwarz, M. J. Lund,  
594 I. Agartz, D. Alnæs, D. M. Barch, R. Baur-Streubel, A. Bertolino,  
595 F. Bettella, M. K. Beyer, E. Bøen, S. Borgwardt, C. L. Brandt, J. Buite-  
596 laar, E. G. Celius, S. Cervenka, A. Conzelmann, A. Córdova-Palomera,  
597 A. M. Dale, D. J. de Quervain, P. D. Carlo, S. Djurovic, E. S. Dørum,  
598 S. Eisenacher, T. Elvsåshagen, T. Espeseth, H. Fatouros-Bergman,  
599 L. Flyckt, B. Franke, O. Frei, B. Haatveit, A. K. Håberg, H. F. Harbo,  
600 C. A. Hartman, D. Heslenfeld, P. J. Hoekstra, E. A. Høgestøl, T. L.  
601 Jernigan, R. Jonassen, E. G. Jönsson, L. Farde, L. Flyckt, G. En-  
602 gberg, S. Erhardt, H. Fatouros-Bergman, S. Cervenka, L. Schwieler,

- 603 F. Piehl, I. Agartz, K. Collste, P. Victorsson, A. Malmqvist, M. Hedberg,  
604 F. Orhan, P. Kirsch, I. Kłoszewska, K. K. Kolskår, N. I. Landrø, S. L.  
605 Hellard, K. P. Lesch, S. Lovestone, A. Lundervold, A. J. Lundervold,  
606 L. A. Maglanoc, U. F. Malt, P. Mecocci, I. Melle, A. Meyer-Lindenberg,  
607 T. Moberget, L. B. Norbom, J. E. Nordvik, L. Nyberg, J. Oosterlaan,  
608 M. Papalino, A. Papassotiropoulos, P. Pauli, G. Pergola, K. Persson,  
609 G. Richard, J. Rokicki, A. M. Sanders, G. Selbæk, A. A. Shadrin, O. B.  
610 Smeland, H. Soininen, P. Sowa, V. M. Steen, M. Tsolaki, K. M. Ul-  
611 richsen, B. Vellas, L. Wang, E. Westman, G. C. Ziegler, M. Zink, O. A.  
612 Andreassen, L. T. Westlye, Common brain disorders are associated with  
613 heritable patterns of apparent aging of the brain, *Nature Neuroscience*  
614 22 (2019) 1617–1623. doi:10.1038/s41593-019-0471-7.
- 615 [12] A. F. Marquand, T. Wolfers, M. Mennes, J. Buitelaar, C. F. Beck-  
616 mann, Beyond Lumping and Splitting: A Review of Computational  
617 Approaches for Stratifying Psychiatric Disorders, 2016b. doi:10.1016/  
618 j.bpsc.2016.04.002.
- 619 [13] J. Lv, M. Di Biase, R. F. Cash, L. Cocchi, V. Croypley, P. Klauser,  
620 Y. Tian, J. Bayer, L. Schmaal, S. Cetin-Karayumak, et al., Individ-  
621 ual deviations from normative models of brain structure in a large  
622 cross-sectional schizophrenia cohort, *bioRxiv* (2020). doi:10.1038/  
623 s41380-020-00882-5.
- 624 [14] S. M. Kia, A. Marquand, Normative Modeling of Neuroimaging Data us-  
625 ing Scalable Multi-Task Gaussian Processes, *Lecture Notes in Computer*  
626 *Science (including subseries Lecture Notes in Artificial Intelligence and*  
627 *Lecture Notes in Bioinformatics)* 11072 LNCS (2018) 127–135. URL:  
628 <http://arxiv.org/abs/1806.01047>. arXiv:1806.01047.
- 629 [15] C. E. Rasmussen, C. K. Williams, *Approximation methods for large*  
630 *datasets* (2005).
- 631 [16] I. Huertas, M. Oldehinkel, E. S. van Oort, D. Garcia-Solis, P. Mir, C. F.  
632 Beckmann, A. F. Marquand, A Bayesian spatial model for neuroimaging  
633 data based on biologically informed basis functions, *NeuroImage* 161  
634 (2017) 134–148. doi:10.1016/j.neuroimage.2017.08.009.
- 635 [17] F. Alfaro-Almagro, M. Jenkinson, N. K. Bangerter, J. L. Andersson,  
636 L. Griffanti, G. Douaud, S. N. Sotiropoulos, S. Jbabdi, M. Hernandez-

- 637        Fernandez, E. Vallee, et al., Image processing and quality control for  
638        the first 10,000 brain imaging datasets from uk biobank, *Neuroimage*  
639        166 (2018) 400–424. doi:10.1016/j.neuroimage.2017.10.034.
- 640 [18] M. Habes, R. Pomponio, H. Shou, J. Doshi, E. Mamourian, G. Erus,  
641        I. Nasrallah, L. J. Launer, T. Rashid, M. Bilgel, et al., The brain chart  
642        of aging: Machine-learning analytics reveals links between brain aging,  
643        white matter disease, amyloid burden, and cognition in the istaging  
644        consortium of 10,216 harmonized mr scans, *Alzheimer’s & Dementia*  
645        (2020). doi:10.1002/alz.12178.
- 646 [19] S. R. Cox, S. J. Ritchie, E. M. Tucker-Drob, D. C. Liewald, S. P.  
647        Hagenaaars, G. Davies, J. M. Wardlaw, C. R. Gale, M. E. Bastin,  
648        I. J. Deary, Ageing and brain white matter structure in 3,513 uk  
649        biobank participants, *Nature communications* 7 (2016) 1–13. doi:10.  
650        1038/ncomms13629.
- 651 [20] K. L. Miller, F. Alfaro-Almagro, N. K. Bangerter, D. L. Thomas, E. Ya-  
652        coub, J. Xu, A. J. Bartsch, S. Jbabdi, S. N. Sotiropoulos, J. L. An-  
653        dersson, L. Griffanti, G. Douaud, T. W. Okell, P. Weale, I. Dragonu,  
654        S. Garratt, S. Hudson, R. Collins, M. Jenkinson, P. M. Matthews,  
655        S. M. Smith, Multimodal population brain imaging in the UK Biobank  
656        prospective epidemiological study, *Nature Neuroscience* 19 (2016) 1523–  
657        1536. doi:10.1038/nn.4393.
- 658 [21] P. McCarthy, funpack, 2020. doi:10.5281/zenodo.3761702.
- 659 [22] C. Fawns-Ritchie, I. J. Deary, Reliability and validity of the UK Biobank  
660        cognitive tests, *PLoS ONE* 15 (2020). doi:10.1371/journal.pone.  
661        0231627.
- 662 [23] D. M. Lyall, B. Cullen, M. Allerhand, D. J. Smith, D. Mackay, J. Evans,  
663        J. Anderson, C. Fawns-Ritchie, A. M. McIntosh, I. J. Deary, J. P. Pell,  
664        Cognitive Test Scores in UK Biobank: Data Reduction in 480,416 Par-  
665        ticipants and Longitudinal Stability in 20,346 Participants, *PLOS ONE*  
666        11 (2016) e0154222. URL: <https://dx.plos.org/10.1371/journal.pone.0154222>. doi:10.1371/journal.pone.0154222.
- 668 [24] A. M. Fjell, K. B. Walhovd, L. T. Westlye, Y. Østby, C. K. Tamnes, T. L.  
669        Jernigan, A. Gamst, A. M. Dale, When does brain aging accelerate?

- 670 dangers of quadratic fits in cross-sectional studies, *Neuroimage* 50 (2010)  
671 1376–1383. doi:10.1016/j.neuroimage.2010.01.061.
- 672 [25] S. M. Kia, H. Huijsdens, R. Dinga, T. Wolfers, M. Mennes, O. A. An-  
673 dreassen, L. T. Westlye, C. F. Beckmann, A. F. Marquand, Hierarchical  
674 bayesian regression for multi-site normative modeling of neuroimaging  
675 data, arXiv preprint arXiv:2005.12055 (2020).
- 676 [26] C. M. Bishop, *Pattern recognition and machine learning*, springer, 2006.
- 677 [27] E. Snelson, Z. Ghahramani, C. E. Rasmussen, Warped gaussian pro-  
678 cesses, in: *Advances in neural information processing systems*, 2004,  
679 pp. 337–344.
- 680 [28] G. Rios, F. Tobar, Compositionally-warped gaussian processes, *Neural*  
681 *Networks* 118 (2019) 235–246. doi:10.1016/j.neunet.2019.06.012.
- 682 [29] M. C. Jones, A. Pewsey, Sinh-arcsinh distributions, *Biometrika* 96  
683 (2009) 761–780. doi:10.1093/biomet/asp053.
- 684 [30] A. F. Marquand, I. Rezek, J. Buitelaar, C. F. Beckmann, Understanding  
685 heterogeneity in clinical cohorts using normative models: beyond case-  
686 control studies, *Biological psychiatry* 80 (2016) 552–561. doi:10.1016/  
687 j.biopsych.2015.12.023.
- 688 [31] G. Nave, W. H. Jung, R. Karlsson Linnér, J. W. Kable, P. D. Koellinger,  
689 Are Bigger Brains Smarter? Evidence From a Large-Scale Prereg-  
690 istered Study, *Psychological Science* 30 (2019) 43–54. URL: <http://journals.sagepub.com/doi/10.1177/0956797618808470>. doi:10.  
691 1177/0956797618808470.
- 692
- 693 [32] R. A. Fisher, L. H. C. Tippett, Limiting forms of the frequency distri-  
694 bution of the largest or smallest member of a sample, in: *Mathematical*  
695 *Proceedings of the Cambridge Philosophical Society*, volume 24, Cam-  
696 bridge University Press, 1928, pp. 180–190.
- 697 [33] T. Wolfers, C. F. Beckmann, M. Hoogman, J. K. Buitelaar, B. Franke,  
698 A. F. Marquand, Individual differences v. the average patient: Map-  
699 ping the heterogeneity in ADHD using normative models, *Psychologi-*  
700 *cal Medicine* 50 (2019) 314–323. URL: <https://pubmed.ncbi.nlm.nih.gov/30782224/>. doi:10.1017/S0033291719000084.  
701



- 702 [34] M. Zabihi, D. L. Floris, S. M. Kia, T. Wolfers, J. Tillmann, A. L. Are-  
703 nas, C. Moessnang, T. Banaschewski, R. Holt, S. Baron-Cohen, E. Loth,  
704 T. Charman, T. Bourgeron, D. Murphy, C. Ecker, J. K. Buitelaar,  
705 C. F. Beckmann, A. Marquand, Fractionating autism based on neu-  
706 roanatomical normative modeling, *Translational Psychiatry* 10 (2020)  
707 1–10. doi:10.1038/s41398-020-01057-0.
